# Supplementary material for: Rabbit Haemorrhagic Disease Virus 2 (RHDV2; GI.2) in Ireland Focusing on Wild Irish Hares (Lepus timidus hibernicus): An Overview of the First Outbreaks and Contextual Review
Source: MDPI journal article supplement (doi:10.3390/pathogens11030288), 2022-02-24
Supplement: s1 [file s1]

**Supplementary Table S1:** Details of recorded from laboratory information management systems (LIMS) of cases of RHDV2 in Ireland and Northern Ireland during outbreaks in 2018–2019.

| I/D                   | Date of Submission | Species | Domestic/Wild | History                                                                                       | Gross PM findings                                                 | Histopathology                                                                                                                                                                    | Other conditions (parasites?)                                                               |
|-----------------------|--------------------|---------|---------------|-----------------------------------------------------------------------------------------------|-------------------------------------------------------------------|-----------------------------------------------------------------------------------------------------------------------------------------------------------------------------------|---------------------------------------------------------------------------------------------|
| <b>Lime/18/02031</b>  | 20/08/2018         | Rabbit  | Domestic x 4  | 100% mortality in group of 23 rabbits; Short duration of illness (<1 day); Some nervous signs | Focal liver abscess in one rabbit                                 | Liver: acute necrotising hepatitis                                                                                                                                                | <i>Staphylococcus</i> spp. Isolated from liver abscess                                      |
| <b>Cork/18/02665</b>  | 21/08/2018         | Rabbit  | Domestic      | 9-week-old rabbit. Six of eight rabbits in litter have died.                                  | Body condition: poor; Lungs: hyperaemia and oedema;               | Liver: peracute to acute massive hepatic necrosis                                                                                                                                 | Parasitology: coccidial oocysts detected in intestinal contents (significance undetermined) |
| <b>GVir/18/01633</b>  | 04/12/2018         | Rabbit  | Domestic      | Diagnostic sample                                                                             | Not applicable                                                    | Not applicable                                                                                                                                                                    |                                                                                             |
| <b>2019–20022 (A)</b> | 25/01/2019         | Rabbit  | Domestic      | Sudden death. No signs noted                                                                  | Pulmonary hyperaemia;                                             | Liver: massive hepatocellular necrosis; periportal lymphocytic infiltration; Lung: necrosis of the vascular endothelium with lymphocytic infiltration of the perivascular spaces. |                                                                                             |
| <b>2019–20022 (B)</b> | 25/01/2019         | Rabbit  | Domestic      | Sudden death. No signs noted                                                                  | Pulmonary hyperaemia; Kidneys: subcapsular petechial haemorrhages | Liver: periportal, necrotising hepatitis. Lung: necrosis of the vascular endothelium with lymphocytic infiltration of the perivascular spaces.                                    |                                                                                             |

|                      |            |        |          |                                                                                                                                       |                                                                                     |                                                                                          |                                                             |
|----------------------|------------|--------|----------|---------------------------------------------------------------------------------------------------------------------------------------|-------------------------------------------------------------------------------------|------------------------------------------------------------------------------------------|-------------------------------------------------------------|
| <b>Cork/19/01277</b> | 15/04/2019 | Rabbit | Domestic | 14-week old rabbit displaying lethargy and progressing quickly to death. 13 animals have died in a group of 16.                       | Unremarkable                                                                        | Liver: necrotising hepatitis                                                             | Parasitology: light coccidial burden in intestinal contents |
| <b>Cork/19/01892</b> | 20/06/2019 | Rabbit | Domestic | Two 4-5-month old rabbits. Sudden death.                                                                                              | Not reported                                                                        | Not reported                                                                             |                                                             |
| <b>Lime/19/01549</b> | 10/07/2019 | Rabbit | Wild     | Found dead                                                                                                                            | Autolysed                                                                           | Not applicable                                                                           |                                                             |
| <b>GVir/19/00931</b> | 25/07/2019 | Rabbit | Wild     | Diagnostic sample                                                                                                                     | Not applicable                                                                      | Not applicable                                                                           |                                                             |
| <b>Kilk/19/02024</b> | 25/07/2019 | Hare   | Wild     | Juvenile hare noticed running in circles before dropping dead                                                                         | Lung: mild multifocal hyperaemia; large volume soft green large intestinal contents | Liver: Multifocal, random, necrotising hepatitis - acute. Spleen: depletion of red pulp. |                                                             |
| <b>Lime/19/01737</b> | 12/08/2019 | Rabbit | Wild     | One of several visibly sick and dying rabbits seen by the National Parks and Wildlife Service (NPWS) Conservation Ranger on an island | Unknown                                                                             | Unknown                                                                                  |                                                             |
| <b>Kilk/19/02157</b> | 14/08/2019 | Hare   | Wild     | Not provided                                                                                                                          | Lungs: mild hyperaemia; Kidneys: hyperaemia                                         | Liver: peracute to acute, multifocal necrotising hepatitis;                              |                                                             |
| <b>Slig/19/03326</b> | 15/08/2019 | Rabbit | Wild     | Found dead. Recent disappearance of rabbits in the locality - some noticed to be lethargic and not eating.                            | Autolysed.                                                                          | Not applicable                                                                           |                                                             |

|                          |            |        |          |                                                                                      |                                                                  |                                                                                                                                                   |
|--------------------------|------------|--------|----------|--------------------------------------------------------------------------------------|------------------------------------------------------------------|---------------------------------------------------------------------------------------------------------------------------------------------------|
| <b>Lime/19/01831</b>     | 26/08/2019 | Rabbit | Wild     | Two rabbits found dead in close proximity. One scavenged and unsuitable for necropsy | Unremarkable.                                                    | Not applicable                                                                                                                                    |
| <b>Cork/19/02403</b>     | 27/08/2019 | Rabbit | Wild     | Convulsing                                                                           | Intestine: multifocal, serosal petechial haemorrhages            | Liver: acute, severe, periportal, necrotising hepatitis; Kidney: multifocal haemorrhages; Heart: multifocal myocardial haemorrhages; Unremarkable |
| <b>Athl/19/01799 (1)</b> | 30/08/2019 | Rabbit | Wild     | Found dead                                                                           | Liver and lungs: multifocal haemorrhages                         | Liver: acute, severe, necrohaemorrhagic hepatitis                                                                                                 |
| <b>Athl/19/01799 (2)</b> | 30/08/2019 | Rabbit | Wild     | Found dead                                                                           | Lungs: multifocal haemorrhages                                   | Liver: acute, multifocal necrotising hepatitis; biliary coccidiosis                                                                               |
| <b>Kilk/19/02288</b>     | 04/09/2019 | Rabbit | Wild     | Not provided                                                                         | Lungs: bilateral, focally extensive haemorrhages in caudal lobes | Liver: acute, multifocal to coalescing, necrotising hepatitis; Lungs: diffuse hyperaemia and multifocal alveolar haemorrhages                     |
| <b>GVir/19/01156</b>     | 10/09/2019 | Rabbit | Domestic | Diagnostic sample                                                                    | Not applicable                                                   | Not applicable                                                                                                                                    |
| <b>Kilk/19/02410</b>     | 19/09/2019 | Rabbit | Domestic | Not provided; lung, liver and spleen submitted for PCR                               | Not applicable                                                   | Not applicable                                                                                                                                    |
| <b>Dubl/19/00429</b>     | 26/09/2019 | Rabbit | Wild     | Young female rabbit found dead                                                       | Liver: 3-4 1mm pale raised foci.                                 | Liver: Severe, acute, periportal necrotising                                                                                                      |

|                      |            |        |      |                                                                                     |                                                                                                                      |                                                                                                                                          |                      |
|----------------------|------------|--------|------|-------------------------------------------------------------------------------------|----------------------------------------------------------------------------------------------------------------------|------------------------------------------------------------------------------------------------------------------------------------------|----------------------|
|                      |            |        |      |                                                                                     |                                                                                                                      | hepatitis and biliary<br>coccidiosis.                                                                                                    |                      |
| <b>Kilk/19/02491</b> | 27/09/2019 | Rabbit | Wild | Not provided                                                                        | Lungs: ecchymotic<br>haemorrhages                                                                                    | Liver: multifocal,<br>primarily periportal,<br>acute necrotising<br>hepatitis; Lungs: mild,<br>eosinophil-rich<br>interstitial pneumonia |                      |
| <b>Kilk/19/02493</b> | 27/09/2019 | Rabbit | Wild | Not provided                                                                        | Autolysed. Mucous<br>membranes pale; blood<br>clots in thoracic and<br>abdominal cavities                            | Unsuitable (autolysis)                                                                                                                   |                      |
| <b>Dubl/19/00432</b> | 30/09/2019 | Rabbit | Wild | Found dead                                                                          | Autolysed.<br>Unremarkable                                                                                           | Unsuitable (autolysis)                                                                                                                   |                      |
| <b>Dubl/19/00438</b> | 01/10/2019 | Hare   | Wild | Neurological signs;<br>died shortly after being<br>brought to veterinary<br>surgery | Unremarkable                                                                                                         | Liver: acute, severe,<br>necrotising periportal<br>hepatitis                                                                             |                      |
| <b>Kilk/19/02514</b> | 01/10/2019 | Rabbit | Wild | Eyelids swollen with<br>white discharge                                             | Multifocal<br>haemorrhage in<br>abdominal cavity;<br>kidneys: ecchymotic<br>haemorrhage on<br>surface of left kidney | Not reported                                                                                                                             |                      |
| <b>Kilk/19/02557</b> | 07/10/2019 | Rabbit | Wild | Not provided                                                                        | Not applicable                                                                                                       | Not applicable                                                                                                                           |                      |
| <b>Dubl/19/00450</b> | 08/10/2019 | Rabbit | Wild | Found dead                                                                          | Autolysis; no obvious<br>gross lesions identified                                                                    | Unsuitable (autolysis)                                                                                                                   |                      |
| <b>Lime/19/02154</b> | 09/10/2019 | Rabbit | Wild | 2 rabbits found dead                                                                | One had caudal skull<br>fracture                                                                                     | Not reported                                                                                                                             | High parasite burden |
| <b>Cork/19/02846</b> | 16/10/2019 | Rabbit | Wild | Not provided                                                                        | Not reported                                                                                                         | Liver: acute, periportal<br>and midzonal<br>necrotising hepatitis;<br>Lungs: interstitial                                                |                      |

|                          |            |        |          |                                                                                       |                                                                             |                                                                                                                                                  |                           |
|--------------------------|------------|--------|----------|---------------------------------------------------------------------------------------|-----------------------------------------------------------------------------|--------------------------------------------------------------------------------------------------------------------------------------------------|---------------------------|
|                          |            |        |          |                                                                                       |                                                                             | pneumonia and haemorrhage                                                                                                                        |                           |
| <b>Athl/19/02067</b>     | 17/10/2019 | Rabbit | Domestic | One of two rabbits to die. Both sick for one day. Anorexic, lethargic, drinking a lot | Orbital abscess                                                             | Liver: acute, necrotising, periportal hepatitis                                                                                                  |                           |
| <b>Kilk/19/02655</b>     | 17/10/2019 | Rabbit | Wild     | Found in extremis                                                                     | Multifocal serosal haemorrhages in stomach, intestines and lungs.           | Liver: subacute, periportal and midzonal necrotising hepatitis; Lungs: mild to moderate interstitial pneumonia with mild, multifocal haemorrhage |                           |
| <b>Dubl/19/00465</b>     | 18/10/2019 | Hare   | Wild     | Hare x 1, found dead in field at a Farm, Gorey, Co Wexford, maybe 5 days dead.        | Findings is consistent with the PCR finding of Rabbit Haemorrhagic Disease. | Histopathology: Severe periportal acute hepatic necrosis.                                                                                        | Some biliary coccidiosis. |
| <b>GVir/19/01307</b>     | 21/10/2019 | Rabbit | Domestic | Diagnostic sample                                                                     | Not applicable                                                              | Not applicable                                                                                                                                   |                           |
| <b>Cork/19/02898</b>     | 22/10/2019 | Rabbit | Wild     | Not provided                                                                          | Not reported                                                                | Histopathology: hepatocellular degeneration and necrosis.                                                                                        |                           |
| <b>Kilk/19/02715 (1)</b> | 23/10/2019 | Rabbit | Wild     | Two rabbits. RHD suspected clinically                                                 | Lungs: multifocal areas of hyperaemia                                       | Liver: acute, moderate, multifocal necrotising hepatitis; Lungs: mild, interstitial pneumonia                                                    |                           |
| <b>Kilk/19/02715 (2)</b> | 23/10/2019 | Rabbit | Wild     | Two rabbits. RHD suspected clinically                                                 | Unremarkable                                                                | Liver: acute, multifocal necrotising hepatitis; Lungs: mild, interstitial pneumonia; Lungs: congested and oedematous,                            |                           |

|                      |            |        |          |                                                                 |                                                                                                                          |                                                                                                                                                                                                                                                                            |                                                                             |
|----------------------|------------|--------|----------|-----------------------------------------------------------------|--------------------------------------------------------------------------------------------------------------------------|----------------------------------------------------------------------------------------------------------------------------------------------------------------------------------------------------------------------------------------------------------------------------|-----------------------------------------------------------------------------|
| <b>Kilk/19/02751</b> | 29/10/2019 | Hare   | Wild     | Found dead as part of RHD passive surveillance                  | Autolysis. Small volume of blood tinged froth in trachea and at nares.<br>Congested (autolysed) liver.                   | Liver: sinusoidal leukocytosis                                                                                                                                                                                                                                             |                                                                             |
| <b>Cork/19/03020</b> | 01/11/2019 | Rabbit | Wild     | Not provided                                                    | Not reported                                                                                                             | Liver: acute, necrotising, hepatitis                                                                                                                                                                                                                                       |                                                                             |
| <b>2019-14567</b>    | 25/11/2019 | Rabbit | Domestic | Sudden death. No signs noted                                    | Hepatomegally; pulmonary hyperaemia and oedema with petechiation; scant, liquid intestinal contents                      | Liver: multifocal to coalescing necrotising hepatitis. Lung: mild peribronchial lymphocytic cuffing; congestion; oedema and haemorrhage in alveoli. Kidneys: Cortical and medullary haemorrhage. Heart: multifocal myocardial haemorrhage. Spleen: multifocal haemorrhages | Parasitology: 700 epg of strongyle eggs (borderline clinical significance). |
| <b>Cork/19/03579</b> | 16/12/2019 | Rabbit | Domestic | Second rabbit to die from group of 3 in last 36 hours; Malaise. | Slight excess serosanguinous fluid in abdominal cavity; Lungs: hyperaemic and oedematous with mild, pleural petechiation | Not reported                                                                                                                                                                                                                                                               | Parasitology: coccidial oocysts in faeces (incidental finding)              |
